# Supplementary material for: A model study on the photochemical isomerization of cyclic silenes
Source: Royal Society of Chemistry journal article supplement (doi:10.1039/c4cp05377j), 2015-01-01
Supplement: c4cp05377j1.pdf [file c4cp05377j1.pdf]

# Supplementary Materials

## A Model Study on The Photochemical Isomerizations of Cyclic Silenes

Ming-Der Su<sup>1,2\*</sup>

<sup>1</sup>Department of Applied Chemistry, National Chiayi University, Chiayi 60004,  
Taiwan

<sup>2</sup>Department of Medicinal and Applied Chemistry, Kaohsiung Medical  
University, Kaohsiung 80708, Taiwan

\*E-mail: [midesu@mail.ncyu.edu.tw](mailto:midesu@mail.ncyu.edu.tw)

The fixed geometrical parameters are shown below:

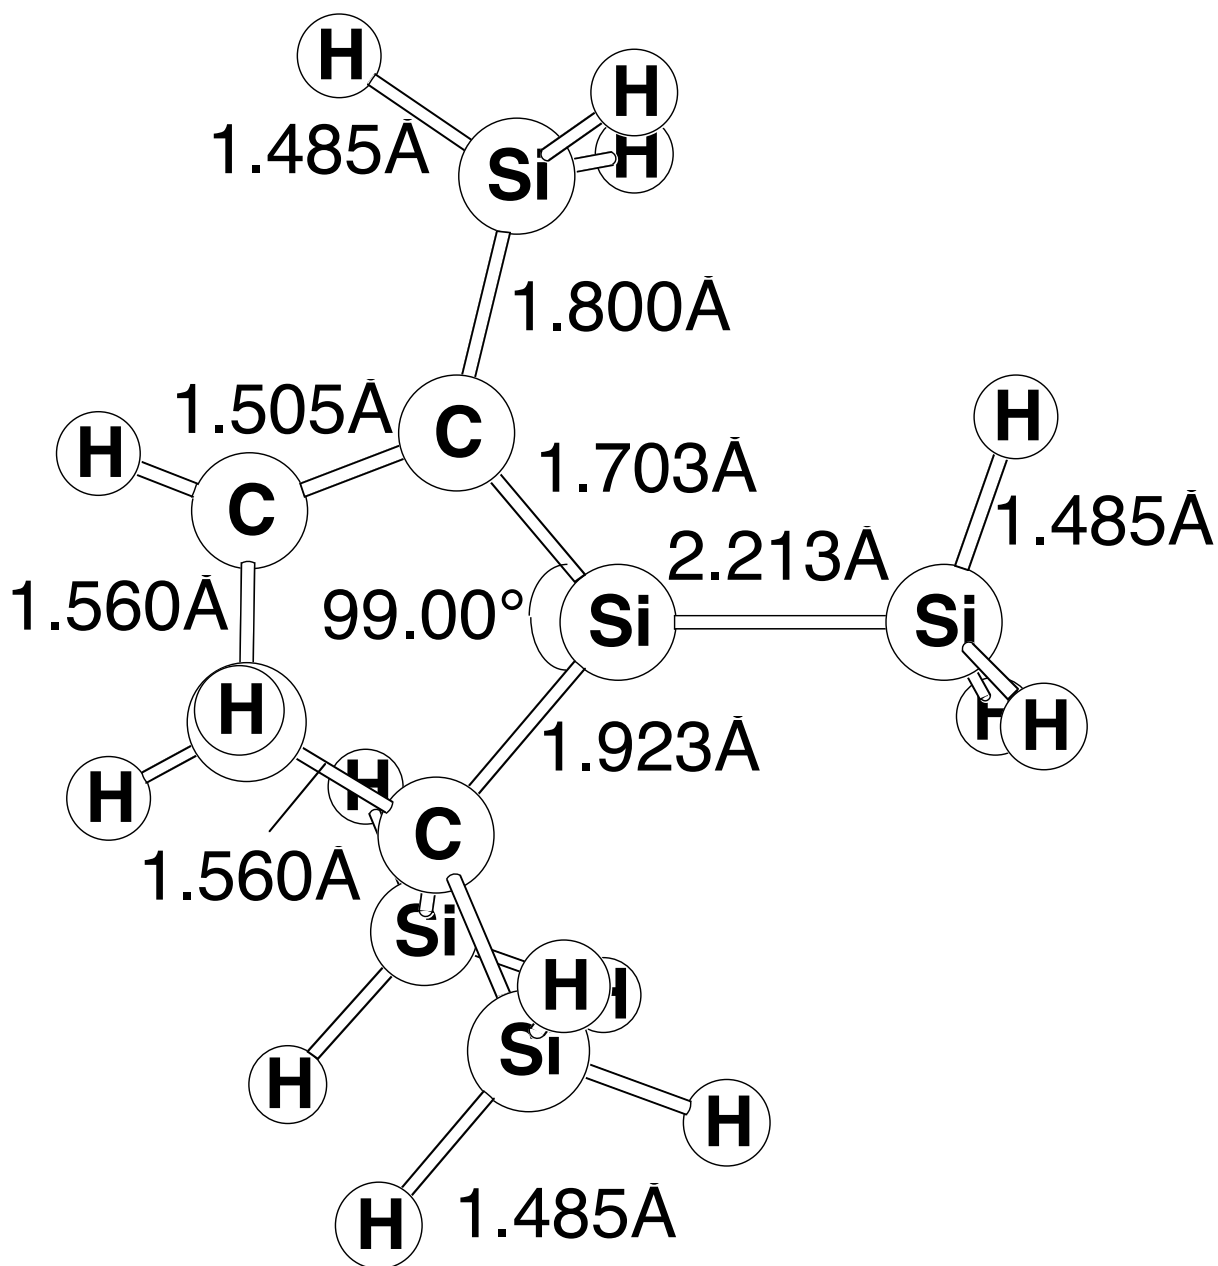

(All geometries were calculated CASSCF(8,8)/6-311G\*)

(1) Rea-3

---

| Atomic<br>Number | Coordinates (Angstroms) |           |           |
|------------------|-------------------------|-----------|-----------|
|                  | X                       | Y         | Z         |
| 14               | 0.000000                | 0.000000  | 0.000000  |
| 6                | 0.000000                | 0.000000  | 1.707676  |
| 6                | 1.464981                | 0.000000  | 2.166735  |
| 6                | 2.375017                | -0.499655 | 1.021559  |
| 6                | 1.851883                | -0.026063 | -0.391151 |
| 14               | -1.765040               | 0.108261  | -1.561919 |
| 14               | -1.400086               | 0.066280  | 2.910995  |
| 14               | 2.486993                | 1.718112  | -0.792048 |
| 14               | 2.348237                | -1.250022 | -1.742007 |
| 1                | 1.613944                | -0.639158 | 3.033925  |
| 1                | 2.369098                | -1.586657 | 1.050353  |
| 1                | 3.404571                | -0.189683 | 1.185327  |
| 1                | -1.530229               | 1.244107  | -2.476240 |
| 1                | -1.809546               | -1.141850 | -2.346728 |
| 1                | -3.033106               | 0.294979  | -0.834449 |
| 1                | -2.693402               | -0.037451 | 2.196500  |
| 1                | -1.317269               | -1.038158 | 3.898328  |
| 1                | -1.408043               | 1.330094  | 3.689651  |
| 1                | 3.960293                | 1.701102  | -0.935424 |
| 1                | 1.897762                | 2.197763  | -2.063166 |
| 1                | 2.127785                | 2.672229  | 0.278137  |
| 1                | 1.756045                | -0.854249 | -3.040870 |
| 1                | 3.818905                | -1.304536 | -1.897920 |
| 1                | 1.861555                | -2.604552 | -1.395785 |
| 1                | 1.755124                | 1.004291  | 2.474416  |

---

CASSCF(8,8)/6-311G(d) = -1605.456023

MP2(8,8)/6-311++G(3df,3pd)//CASSCF(8,8)/6-311G(d) = -1607.555703

(2) FC

CASSCF(8,8)/6-311G(d) = -1605.253715

MP2(8,8)/6-311++G(3df,3pd)//CASSCF(8,8)/6-311G(d) = -1607.371557

(3) S1/S0 CI

---

| Atomic<br>Number | Coordinates (Angstroms) |          |           |
|------------------|-------------------------|----------|-----------|
|                  | X                       | Y        | Z         |
| 14               | -0.266289               | 0.187136 | -0.218131 |

---

S-3

|    |           |           |           |
|----|-----------|-----------|-----------|
| 6  | 0.123824  | 0.822848  | 1.481760  |
| 6  | 1.562107  | 0.867826  | 1.633775  |
| 6  | 2.392939  | 0.176763  | 0.566881  |
| 6  | 1.578830  | 0.037623  | -0.780364 |
| 14 | -1.758421 | -1.652673 | -0.335688 |
| 14 | -1.031161 | 1.082072  | 2.940716  |
| 14 | 1.982032  | 1.496893  | -1.932499 |
| 14 | 2.038161  | -1.593911 | -1.624784 |
| 1  | 2.029996  | 1.204089  | 2.543587  |
| 1  | 2.670716  | -0.805487 | 0.958633  |
| 1  | 3.335862  | 0.695719  | 0.409195  |
| 1  | -2.422174 | 1.187853  | 2.450708  |
| 1  | -0.928843 | -0.072589 | 3.864294  |
| 1  | -0.684145 | 2.307717  | 3.690472  |
| 1  | -3.093335 | -1.193870 | 0.104047  |
| 1  | -1.852457 | -2.105786 | -1.740758 |
| 1  | -1.349085 | -2.799848 | 0.506083  |
| 1  | 3.418053  | 1.461055  | -2.301820 |
| 1  | 1.179018  | 1.421004  | -3.171358 |
| 1  | 1.711216  | 2.782250  | -1.258318 |
| 1  | 1.443566  | -1.689105 | -2.979288 |
| 1  | 3.511135  | -1.709653 | -1.747204 |
| 1  | 1.561048  | -2.740812 | -0.818198 |
| 1  | 0.624392  | 2.461485  | 1.182024  |

---

Derivative Coupling

|     |               |               |               |
|-----|---------------|---------------|---------------|
| -1  | 0.0004731585  | -0.0001931899 | 0.0168077260  |
| -2  | -0.0162972620 | -0.0578376432 | -0.0071412751 |
| -3  | -0.0268828699 | 0.0350143255  | -0.0125378819 |
| -4  | 0.0002654837  | 0.0046836739  | -0.0056163860 |
| -5  | 0.0020490011  | -0.0011543530 | 0.0010174242  |
| -6  | -0.0001149901 | 0.0023917107  | 0.0002312968  |
| -7  | 0.0000169041  | -0.0018385177 | -0.0033299669 |
| -8  | -0.0006870984 | 0.0006248103  | 0.0000706901  |
| -9  | -0.0002835411 | -0.0000153979 | -0.0002607724 |
| -10 | 0.0000698558  | -0.0006762861 | 0.0006504147  |
| -11 | -0.0020380974 | 0.0012354776  | 0.0032140980  |
| -12 | -0.0000712265 | -0.0001065885 | 0.0010486216  |
| -13 | 0.0001177231  | -0.0001324539 | 0.0002797254  |
| -14 | 0.0003542354  | 0.0008792111  | 0.0004753813  |

|     |               |               |               |
|-----|---------------|---------------|---------------|
| -15 | 0.0000778478  | 0.0011349831  | 0.0000569668  |
| -16 | 0.0000145100  | -0.0001801569 | 0.0000108790  |
| -17 | -0.0000826573 | -0.0003083874 | 0.0000672264  |
| -18 | 0.0000391051  | 0.0001428161  | -0.0005216314 |
| -19 | 0.0001072954  | 0.0001118132  | -0.0000166449 |
| -20 | 0.0002077979  | -0.0002847075 | 0.0001415898  |
| -21 | -0.0000620026 | -0.0000619791 | -0.0003221870 |
| -22 | 0.0000782890  | 0.0001193472  | 0.0001300417  |
| -23 | 0.0002014964  | -0.0001179602 | 0.0000166311  |
| -24 | 0.0001594415  | 0.0000096949  | 0.0000489451  |
| -25 | 0.0422876004  | 0.0165597578  | 0.0054790876  |

Unscaled Gradient Difference

|     |               |               |               |
|-----|---------------|---------------|---------------|
| -1  | -0.0067654167 | 0.0148778148  | 0.0161443600  |
| -2  | -0.1077357807 | 0.0212208375  | -0.0380800112 |
| -3  | 0.1019430417  | 0.0741982163  | 0.0028874937  |
| -4  | -0.0025712800 | -0.0081030484 | 0.0044289426  |
| -5  | 0.0047575545  | 0.0016643132  | -0.0005651728 |
| -6  | -0.0001558981 | 0.0036612850  | 0.0014550136  |
| -7  | -0.0014948610 | -0.0105162845 | -0.0040183891 |
| -8  | -0.0014734866 | -0.0035663991 | 0.0004511936  |
| -9  | 0.0001639539  | 0.0012633744  | 0.0005054703  |
| -10 | -0.0005514561 | -0.0016283380 | -0.0008588049 |
| -11 | 0.0005636646  | -0.0041614050 | 0.0008573461  |
| -12 | -0.0013378295 | -0.0008369583 | 0.0006378675  |
| -13 | 0.0006325342  | 0.0005887889  | -0.0000798486 |
| -14 | 0.0008766033  | 0.0005557920  | 0.0023403786  |
| -15 | 0.0005221560  | 0.0009146677  | 0.0002230805  |
| -16 | -0.0000300283 | -0.0003856184 | -0.0000158305 |
| -17 | 0.0002244621  | -0.0000604044 | 0.0001907532  |
| -18 | -0.0000206316 | 0.0000757922  | -0.0007190518 |
| -19 | 0.0000865566  | 0.0007440092  | 0.0000095432  |
| -20 | 0.0000813871  | 0.0007537687  | 0.0000123569  |
| -21 | -0.0003637742 | 0.0011996447  | 0.0006155663  |
| -22 | -0.0000628493 | -0.0002451919 | -0.0003246242 |
| -23 | 0.0003332586  | -0.0002676992 | 0.0000086457  |
| -24 | -0.0000035541 | -0.0000885704 | -0.0001585187 |
| -25 | 0.0123816737  | -0.0918583870 | 0.0140522402  |

-----  
CASSCF(8,8)/6-311G(d) = -1605.2724932964

MP2(8,8)/6-311++G(3df,3pd)//CASSCF(8,8)/6-311G(d)= -1607.383225

MP2(8,8)/6-311++G(3df,3pd)//CASSCF(8,8)/6-311G(d)= -1607.385615

#### (4) Pro-4

---

| Atomic<br>Number | Coordinates (Angstroms) |           |           |
|------------------|-------------------------|-----------|-----------|
|                  | X                       | Y         | Z         |
| 14               | 0.000000                | 0.000000  | 0.000000  |
| 6                | 0.000000                | 0.000000  | 1.879521  |
| 6                | 1.288372                | 0.000000  | 2.284686  |
| 6                | 2.420431                | 0.000866  | 1.276907  |
| 6                | 1.878456                | 0.333389  | -0.162671 |
| 14               | -0.877767               | -2.016091 | -0.900747 |
| 14               | -1.430112               | -0.016231 | 3.082402  |
| 14               | 2.134501                | 2.183097  | -0.501845 |
| 14               | 2.772050                | -0.700392 | -1.464840 |
| 1                | 1.569962                | -0.035610 | 3.350824  |
| 1                | 2.896717                | -0.979019 | 1.306635  |
| 1                | 3.192879                | 0.700936  | 1.590337  |
| 1                | -2.368233               | -1.112525 | 2.753074  |
| 1                | -0.929617               | -0.207637 | 4.461789  |
| 1                | -2.180907               | 1.256804  | 3.016258  |
| 1                | -2.332793               | -2.059015 | -0.626164 |
| 1                | -0.677892               | -2.081313 | -2.366500 |
| 1                | -0.245920               | -3.202566 | -0.282221 |
| 1                | 3.581965                | 2.498906  | -0.497553 |
| 1                | 1.573195                | 2.562875  | -1.815941 |
| 1                | 1.484259                | 2.991534  | 0.552543  |
| 1                | 2.264941                | -0.392385 | -2.820425 |
| 1                | 4.228375                | -0.435331 | -1.436189 |
| 1                | 2.564691                | -2.141805 | -1.197462 |
| 1                | -0.803597               | 1.106950  | -0.579767 |

---

CASSCF(8,8)/6-311G(d) = -1605.5211230004

MP2(8,8)/6-311++G(3df,3pd)//CASSCF(8,8)/6-311G(d)= -1607.575212

#### (5) TS

---

| Atomic<br>Number | Coordinates (Angstroms) |          |           |
|------------------|-------------------------|----------|-----------|
|                  | X                       | Y        | Z         |
| 14               | -0.265288               | 0.181868 | -0.216522 |
| 6                | 0.123869                | 0.818762 | 1.483551  |
| 6                | 1.563677                | 0.865730 | 1.637757  |
| 6                | 2.397374                | 0.176677 | 0.570872  |

---

|    |           |           |           |
|----|-----------|-----------|-----------|
| 6  | 1.579893  | 0.035822  | -0.777157 |
| 14 | -1.758799 | -1.656939 | -0.333466 |
| 14 | -1.036807 | 1.086201  | 2.936781  |
| 14 | 1.979090  | 1.495809  | -1.930588 |
| 14 | 2.042297  | -1.591903 | -1.625895 |
| 1  | 2.028742  | 1.202260  | 2.548667  |
| 1  | 2.678821  | -0.802620 | 0.966718  |
| 1  | 3.338797  | 0.699306  | 0.417176  |
| 1  | -2.422718 | 1.202592  | 2.433773  |
| 1  | -0.944761 | -0.069664 | 3.864044  |
| 1  | -0.686740 | 2.311761  | 3.682673  |
| 1  | -3.083486 | -1.198220 | 0.134028  |
| 1  | -1.880829 | -2.089291 | -1.743478 |
| 1  | -1.340548 | -2.816257 | 0.486628  |
| 1  | 3.414063  | 1.446068  | -2.315525 |
| 1  | 1.165123  | 1.426789  | -3.163957 |
| 1  | 1.723839  | 2.782134  | -1.252684 |
| 1  | 1.446676  | -1.686403 | -2.974721 |
| 1  | 3.512022  | -1.697716 | -1.759374 |
| 1  | 1.575912  | -2.746186 | -0.822047 |
| 1  | 0.626767  | 2.452018  | 1.176507  |

---

|     |       |       |       |
|-----|-------|-------|-------|
| -1  | 0.00  | 0.00  | 0.00  |
| -2  | 0.00  | 0.02  | -0.01 |
| -3  | 0.03  | -0.07 | 0.02  |
| -4  | 0.01  | -0.01 | 0.00  |
| -5  | 0.00  | 0.00  | 0.00  |
| -6  | 0.00  | 0.00  | 0.00  |
| -7  | 0.00  | 0.00  | 0.00  |
| -8  | 0.00  | 0.00  | 0.00  |
| -9  | 0.00  | 0.00  | 0.00  |
| -10 | 0.04  | 0.09  | -0.05 |
| -11 | 0.04  | -0.02 | -0.04 |
| -12 | 0.00  | 0.01  | 0.01  |
| -13 | 0.00  | 0.00  | 0.00  |
| -14 | 0.00  | -0.01 | -0.01 |
| -15 | -0.01 | -0.01 | 0.01  |
| -16 | 0.00  | 0.00  | 0.00  |
| -17 | 0.00  | 0.00  | 0.00  |
| -18 | 0.01  | 0.01  | 0.00  |

|     |       |      |       |
|-----|-------|------|-------|
| -19 | 0.00  | 0.00 | 0.00  |
| -20 | 0.00  | 0.00 | 0.00  |
| -21 | 0.00  | 0.00 | 0.00  |
| -22 | 0.00  | 0.00 | 0.00  |
| -23 | 0.00  | 0.00 | 0.00  |
| -24 | 0.00  | 0.00 | 0.00  |
| -25 | -0.60 | 0.78 | -0.12 |

---

CASSCF(8,8)/6-311G(d) = --1605.315988

MP2(8,8)/6-311++G(3df,3pd)//CASSCF(8,8)/6-311G(d)= -1607.3889661
